# Supplementary material for: Exploration of the unusual two-step volume phase transition of the poly(N-vinylcaprolactam-co-hydroxyethyl methacrylate) hydrogel
Source: Royal Society of Chemistry journal article supplement (doi:10.1039/c8cp02429d), 2018-01-01
Supplement: c8cp02429d1.pdf [file c8cp02429d1.pdf]

## Supporting Information

### **Exploration of the unusual two-step volume phase transition of the poly(*N*-vinylcaprolactam-*co*-hydroxyethyl methacrylate) hydrogel**

*Gehong Su,<sup>a</sup> Liyang Jia,<sup>a</sup> Xueqian Zhang,<sup>a</sup> Yulin Zhang,<sup>a</sup> Pengchi Deng,<sup>b</sup> and Tao Zhou<sup>a,\*</sup>*

<sup>a</sup> State Key Laboratory of Polymer Materials Engineering of China, Polymer Research Institute,  
Sichuan University, Chengdu 610065, China; <sup>b</sup> Analytical & Testing Center, Sichuan University,  
Chengdu 610065, China

\*Corresponding author. Tel.: +86-28-85402601; Fax: +86-28-85402465. E-mail address:  
zhoutaopoly@scu.edu.cn (T. Zhou)

## 1. Theory of the scaling-MW2D spectroscopy based on auto-correlation

$W(\nu, T)$  is a  $M \times N$  spectral intensity matrix. The  $\nu$  and  $T$  are spectral variable (e.g., wavenumber) and perturbation variable (e.g., temperature), respectively.

$$W(\nu, T) = \begin{pmatrix} y(\nu, T_1) \\ \vdots \\ y(\nu, T_j) \\ \vdots \\ y(\nu, T_M) \end{pmatrix} \quad (1)$$

The reference spectrum and dynamic spectrum in the  $j$ th submatrix of  $W(\nu, T)$ :

$$\bar{y}(\nu) = \frac{1}{2m+1} \sum_{j=j-m}^{j+m} y(\nu, T_j) \quad (2)$$

$$\tilde{y}(\nu, T_j) = y(\nu, T_j) - \bar{y}(\nu) \quad (3)$$

where  $J$  corresponds to the index of rows. A mean-centered  $j$ th submatrix of  $W(\nu, T)$  is obtained.

$$w_j(\nu, T) = \begin{pmatrix} \tilde{y}(\nu, T_{j-m}) \\ \vdots \\ \tilde{y}(\nu, T_j) \\ \vdots \\ \tilde{y}(\nu, T_{j+m}) \end{pmatrix} \quad (4)$$

The  $w_j(\nu, T)$  has  $2m+1$  rows which is called the window size. The index range of the perturbation variable  $I$  of  $w_j(\nu, T)$  is from  $j-m$  to  $j+m$ .

The generalized synchronous 2D correlation spectra is calculated from  $w_j(\nu, T)$ :

$$\Phi_j(\nu_1, \nu_2) = \frac{1}{2m} \sum_{j=j-m}^{j+m} \tilde{y}(\nu_1, T_j) \cdot \tilde{y}(\nu_2, T_j) \quad (5)$$

For each window, the standard deviations of spectral intensities at  $\nu_1$  and  $\nu_2$  are defined as follows.

$$\sigma(\nu_1) = \sqrt{\Phi_j(\nu_1, \nu_1)} \quad (6)$$

$$\sigma(v_2) = \sqrt{\Phi_j(v_2, v_2)} \quad (7)$$

The correlation coefficient  $\rho(v_1, v_2)$  is defined:

$$\rho(v_1, v_2) = \Phi_j(v_1, v_2) / [\sigma(v_1) \cdot \sigma(v_2)] \quad (8)$$

The scaled forms of the synchronous correlation spectrum in each window are defined:

$$\Phi_j(v_1, v_2)^{(Scaled)} = \Phi_j(v_1, v_2) \cdot [\sigma(v_1) \cdot \sigma(v_2)]^{-\alpha} \cdot |\rho(v_1, v_2)|^\beta \quad (9)$$

The constant  $\alpha$  is the scaling factor, and  $\beta$  is correlation enhance factor. The value of  $\alpha$  is limited to 0–1.0.

For scaling-MW2D based on auto-correlation, the each row of the correlation matrix of scaling-MW2D is directly extracted from a diagonal line of  $\Phi_j^{(Scaled)}$  matrix, namely  $v_1=v_2$ . Thus, the auto-correlation scaling-MW2D can be described below.

$$\Phi_j(v_1, v_1)^{(Scaled)} = \Phi_j(v_1, v_1) \cdot [\sigma(v_1) \cdot \sigma(v_1)]^{-\alpha} \cdot |\rho(v_1, v_1)|^\beta \quad (10)$$

$$\rho(v_1, v_1) = \Phi_j(v_1, v_1) / [\sigma(v_1) \cdot \sigma(v_1)] = 1 \quad (11)$$

$$\Phi_j(v_1, v_1)^{(Scaled)} = [\Phi_j(v_1, v_1)]^{1-\alpha} \quad (12)$$

The auto-correlation scaling-MW2D correlation spectrum is gained *via* sliding window position from  $j=I+m$  to  $M-m$  and repeating calculations of equation (2)-(12) at each window.

## 2. Determination of the gel content

Gel content of the resultant PVCL-co-HEMA hydrogel was measured according to the following procedure:

The newly synthesized hydrogel was dried in a vacuum oven to the constant weight, and then the hydrogel was extracted with ethanol in a Soxhlet extractor for 48 h (90 °C). After that, the extraction product was dried again to constant weight, and the gel content was calculated as

$$W_{gel} = \frac{W_d}{W_i} \times 100\%$$

where  $w_d$  is the weight of dried gel after extraction, and  $w_i$  is the initial weight of the newly synthesized gel after drying.

The gel content of the resultant PVCL-co-HEMA hydrogel in our study was measured as 82.4 wt%.

### 3. Determination of the VCL weight fraction in the gel

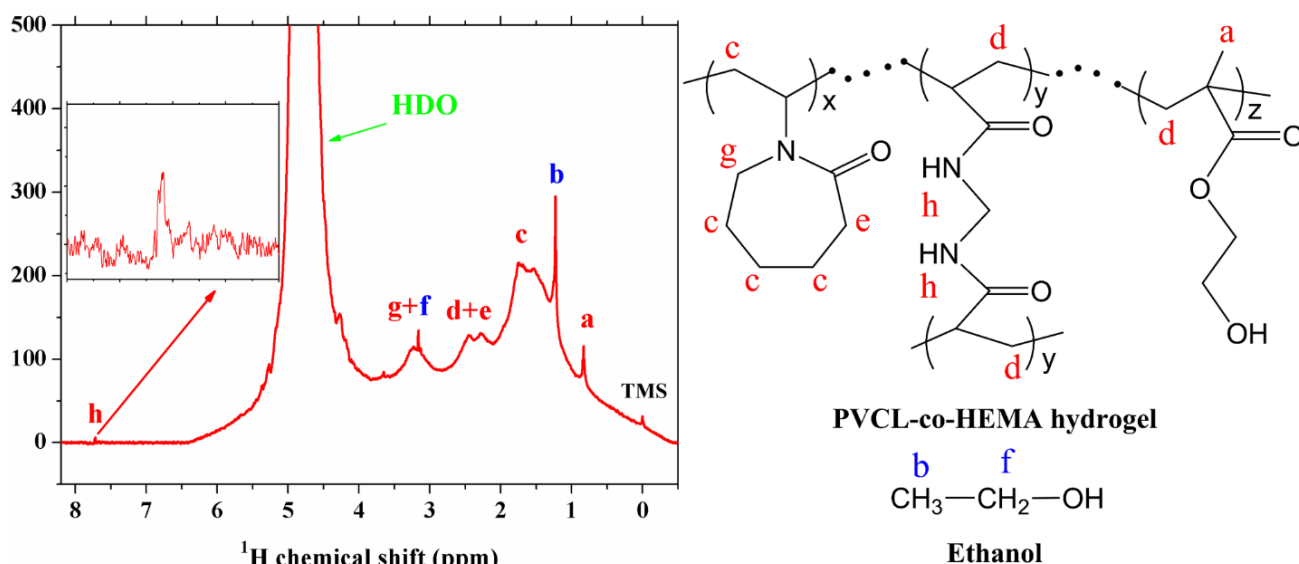

**Fig. S1**  $^1\text{H}$  HRMAS NMR spectrum of PVCL-co-HEMA hydrogel collected at 600.10 MHz.

**Fig. S1** shows the  $^1\text{H}$  HRMAS NMR spectrum of the swollen PVCL-co-HEMA hydrogel. The detailed assignments of the resonances in **Fig. S1** are summarized in **Table S1**. Based on the obtained  $^1\text{H}$  HRMAS NMR spectrum, the molar fraction of VCL and HEMA in the resultant PVCL-co-HEMA hydrogel can be calculated:

$$x_{HEMA} = \left(\frac{A_a}{3}\right) / \left[ \frac{A_c + A_{d+e} + A_{f+g} - \left(\frac{A_b}{3} \times 2\right) - A_b - \left(\frac{A_a}{3} \times 2\right) - \left(\frac{A_h}{2} \times 4\right)}{12} + \frac{A_a}{3} \right]$$

$$x_{VCL} = 1 - x_{HEMA}$$

where A represents the integral area.

Therefore, the weight fraction of VCL and HEMA in the gel can be obtained:

$$\omega_{VCL} = \frac{x_{VCL} \times M_{VCL}}{x_{VCL} \times M_{VCL} + x_{HEMA} \times M_{HEMA}} \times 100\%$$

$$\omega_{HEMA} = 1 - \omega_{VCL}$$

where  $M_{VCL}$  and  $M_{HEMA}$  represent the relative molecular mass of VCL and HEMA, respectively.

Based on these two equations, the molar fraction of VCL and HEMA in the resultant

PVCL-*co*-HEMA hydrogel was calculated as 88.6 % and 11.4 %, respectively. Besides, the weight fraction of VCL and HEMA in the gel was 89.3 % and 10.7 %, respectively.

**Table S1.**  $^1\text{H}$  resonances of PVCL-*co*-HEMA hydrogel observed in **Fig. S1**

|          | $^1\text{H}$ chemical shifts (ppm) | Assignment                   | References |
|----------|------------------------------------|------------------------------|------------|
| <b>a</b> | 0.83                               | -CH <sub>3</sub> , PHEMA     | 1          |
| <b>b</b> | 1.23                               | -CH <sub>3</sub> , ethanol   | 2, 3       |
| <b>c</b> | 1.63                               | -CH <sub>2</sub> , PVCL      | 4, 5       |
| <b>d</b> | 2.29                               | -CH <sub>2</sub> , PHEMA+BIS | 1, 6       |
| <b>e</b> | 2.45                               | -CH <sub>2</sub> , PVCL      | 4, 5       |
| <b>f</b> | 3.16                               | -CH <sub>2</sub> , ethanol   | 2, 3       |
| <b>g</b> | 3.23                               | -CH <sub>2</sub> , PVCL      | 4, 5       |
| <b>h</b> | 7.72                               | -NH, BIS                     | 6          |
|          | 4.75                               | HDO                          | 7          |

#### 4. Digital photographs of the Gel-2 hydrogel and the Gel-12 hydrogel

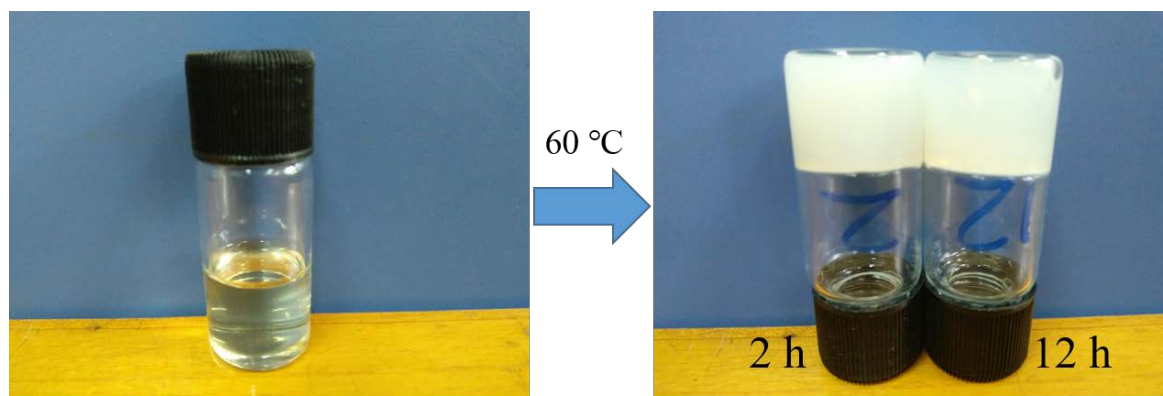

**Fig. S2** Photographs of the monomer solution (left) and the resultant PVCL-*co*-HEMA hydrogels (right).

#### 5. Second-derivative spectra in the region of C–H stretching vibration

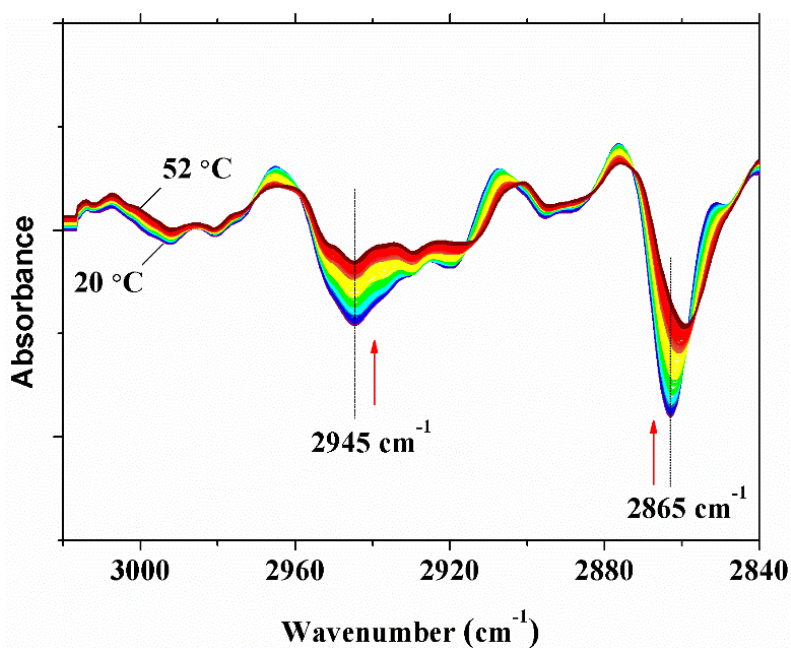

**Fig. S3** Second-derivative FTIR spectra of the temperature-dependent FTIR spectra in the region of C–H stretching (3020–2840  $\text{cm}^{-1}$ ).

## 6. Generalized 2D correlation FTIR spectra

### 2D Synchronous

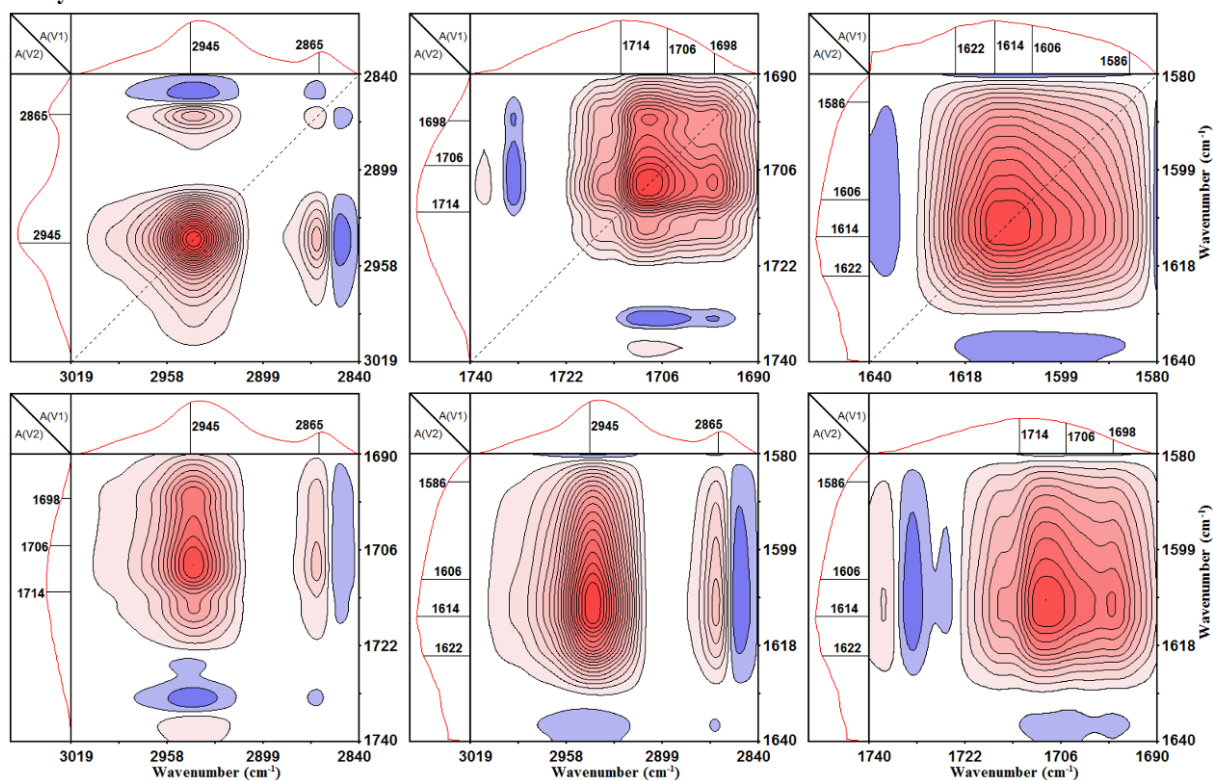

### 2D Asynchronous

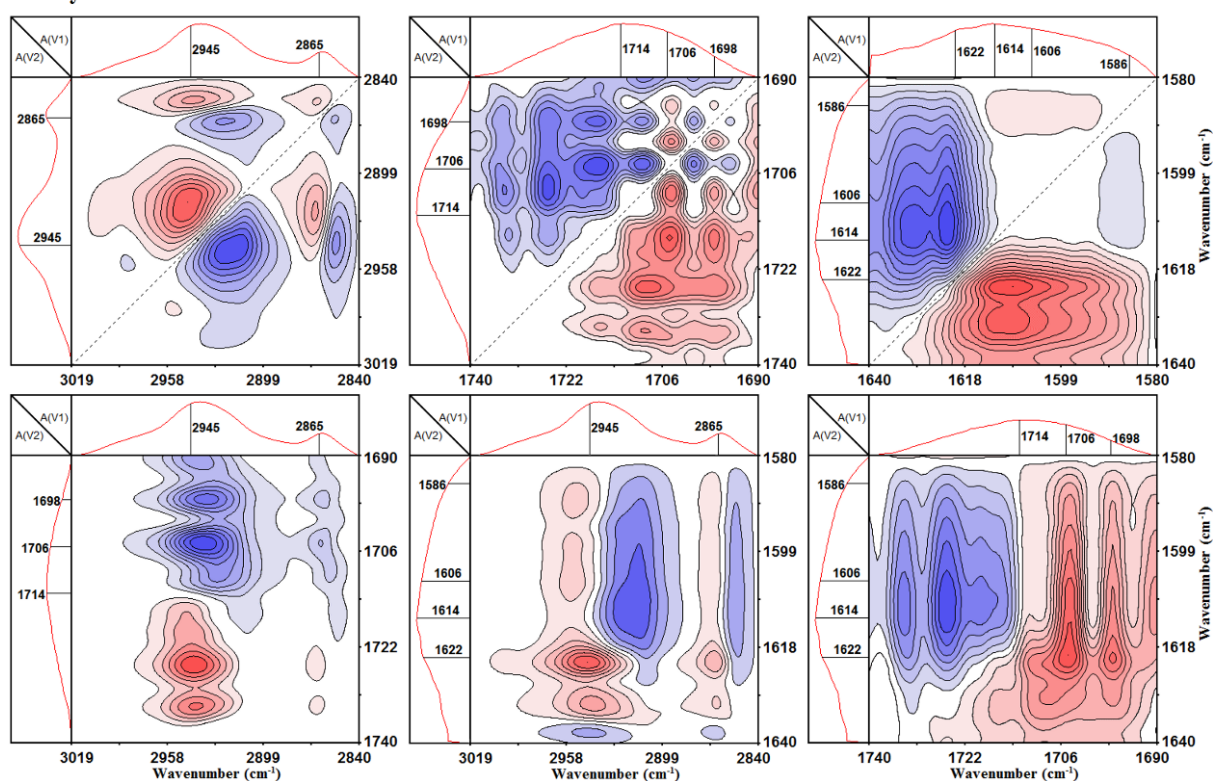

**Fig. S4** Synchronous (top) and asynchronous (bottom) generalized 2D correlation FTIR spectra of PVCL-*co*-HEMA hydrogel calculated from the temperature-dependent FTIR spectra within the step I (25.0-32.3 °C). Herein, the red color is defined as positive correlation intensity, while blue color represents the negative correlation.

## 2D Synchronous

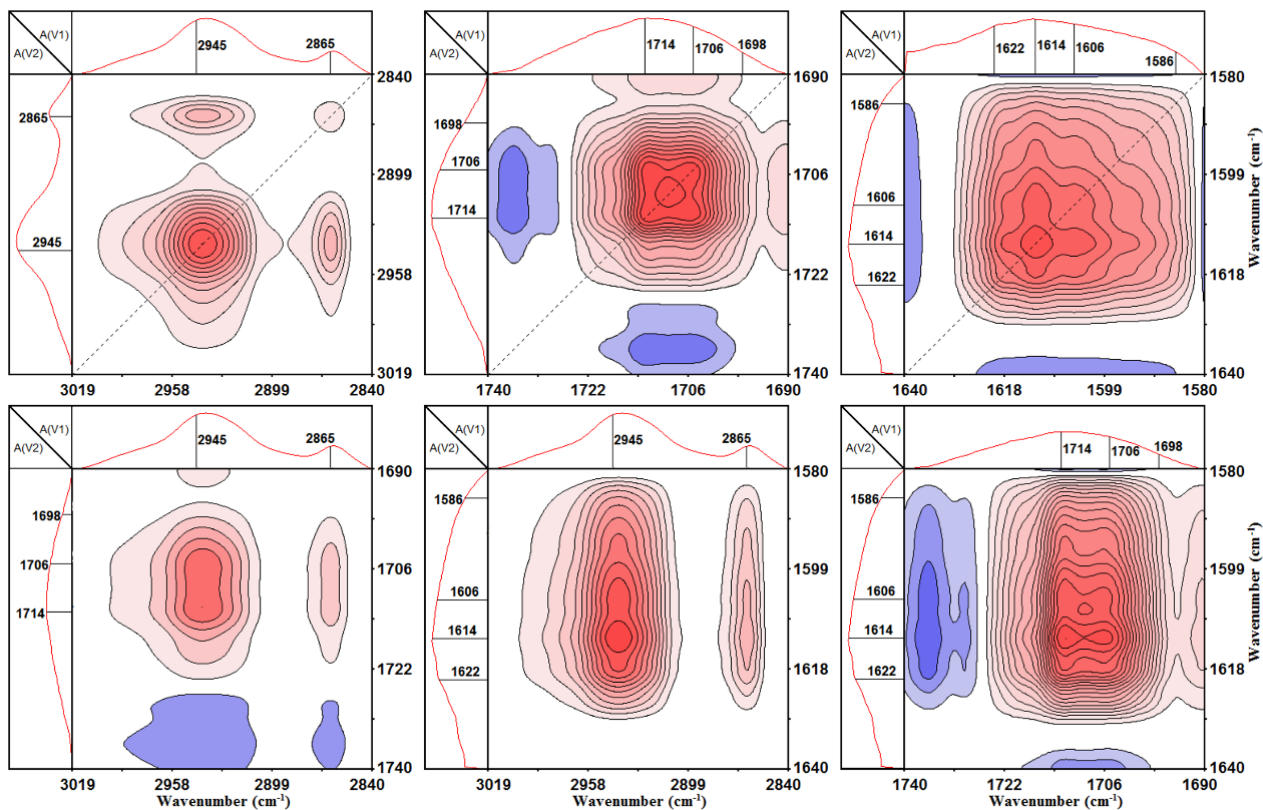

## 2D Asynchronous

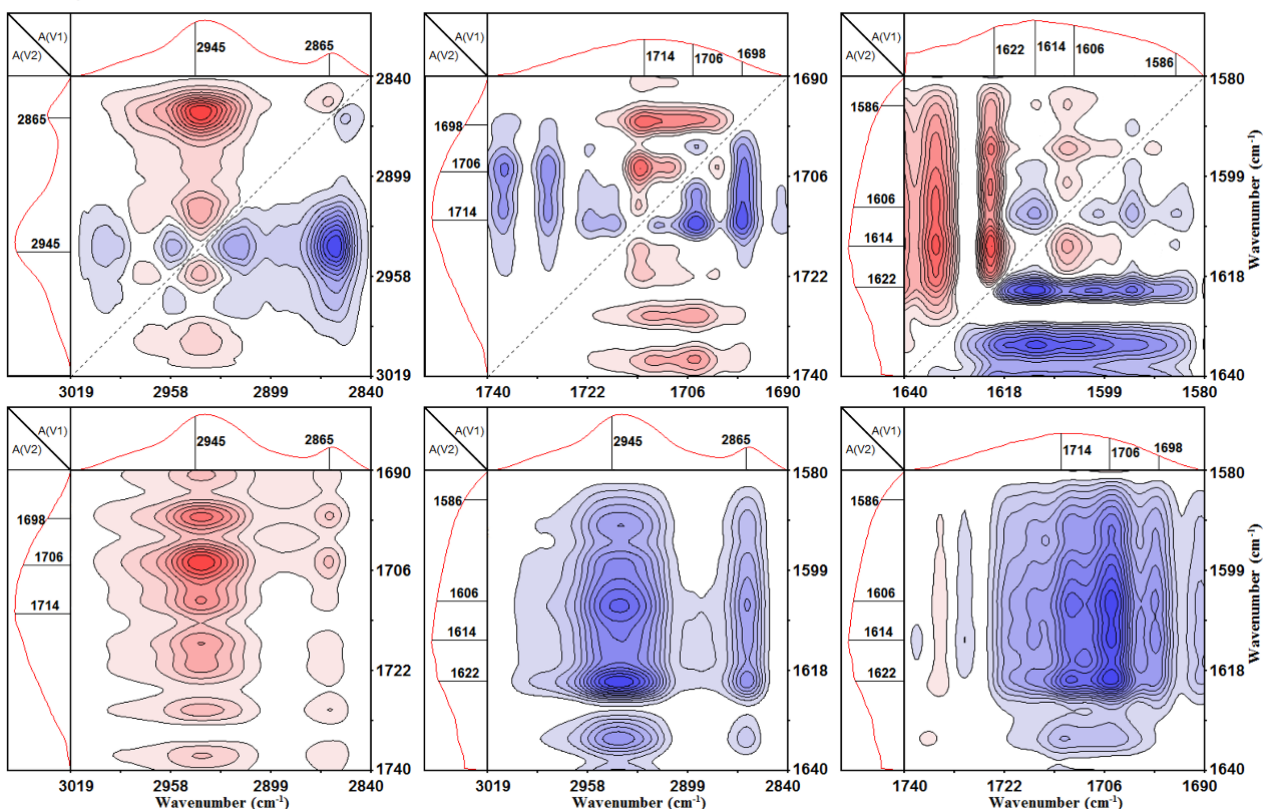

**Fig. S5** Synchronous (top) and asynchronous (bottom) generalized 2D correlation FTIR spectra of PVCL-*co*-HEMA hydrogel calculated from the temperature-dependent FTIR spectra within the step II (32.3-46.8 °C).



**Table S2.** The sequential order of step I (25.0-32.3 °C) obtained from the synchronous and asynchronous generalized 2D correlation FTIR spectra of **Fig. S4**

| Cross peaks (cm <sup>-1</sup> , cm <sup>-1</sup> )                                                                                            | Synchronous | Asynchronous | Sequential order |
|-----------------------------------------------------------------------------------------------------------------------------------------------|-------------|--------------|------------------|
| (2945, 2865)                                                                                                                                  | +           | -            | 2865→2945        |
| 2865 cm <sup>-1</sup> → 2945 cm <sup>-1</sup>                                                                                                 |             |              |                  |
| (1714, 1706)                                                                                                                                  | +           | -            | 1706→1714        |
| (1714, 1698)                                                                                                                                  | +           | -            | 1698→1714        |
| (1706, 1698)                                                                                                                                  | +           | +            | 1706→1698        |
| 1706 cm <sup>-1</sup> → 1698 cm <sup>-1</sup> → 1714 cm <sup>-1</sup>                                                                         |             |              |                  |
| (1622, 1614)                                                                                                                                  | +           | -            | 1614→1622        |
| (1622, 1606)                                                                                                                                  | +           | -            | 1606→1622        |
| (1622, 1586)                                                                                                                                  | +           | -            | 1586→1622        |
| (1614, 1606)                                                                                                                                  | +           | -            | 1606→1614        |
| (1614, 1586)                                                                                                                                  | +           | +            | 1614→1586        |
| (1606, 1586)                                                                                                                                  | +           | +            | 1606→1586        |
| 1606 cm <sup>-1</sup> → 1614 cm <sup>-1</sup> → 1586 cm <sup>-1</sup> → 1622 cm <sup>-1</sup>                                                 |             |              |                  |
| (2945, 1714)                                                                                                                                  | +           | -            | 1714→2945        |
| (2945, 1706)                                                                                                                                  | +           | -            | 1706→2945        |
| (2945, 1698)                                                                                                                                  | +           | -            | 1698→2945        |
| (2865, 1714)                                                                                                                                  | +           | -            | 1714→2865        |
| (2865, 1706)                                                                                                                                  | +           | -            | 1706→2865        |
| (2865, 1698)                                                                                                                                  | +           | -            | 1698→2865        |
| 1706 cm <sup>-1</sup> → 1698 cm <sup>-1</sup> → 1714 cm <sup>-1</sup> → 2865 cm <sup>-1</sup> → 2945 cm <sup>-1</sup>                         |             |              |                  |
| (2945, 1622)                                                                                                                                  | +           | +            | 2945→1622        |
| (2945, 1614)                                                                                                                                  | +           | +            | 2945→1614        |
| (2945, 1606)                                                                                                                                  | +           | +            | 2945→1606        |
| (2945, 1586)                                                                                                                                  | +           | +            | 2945→1586        |
| (2865, 1622)                                                                                                                                  | +           | +            | 2865→1622        |
| (2865, 1614)                                                                                                                                  | +           | +            | 2865→1614        |
| (2865, 1606)                                                                                                                                  | +           | +            | 2865→1606        |
| (2865, 1586)                                                                                                                                  | +           | +            | 2865→1586        |
| 2865 cm <sup>-1</sup> → 2945 cm <sup>-1</sup> → 1606 cm <sup>-1</sup> → 1614 cm <sup>-1</sup> → 1586 cm <sup>-1</sup> → 1622 cm <sup>-1</sup> |             |              |                  |
| (1714, 1622)                                                                                                                                  | +           | +            | 1714→1622        |
| (1714, 1614)                                                                                                                                  | +           | +            | 1714→1614        |
| (1714, 1606)                                                                                                                                  | +           | +            | 1714→1606        |
| (1714, 1586)                                                                                                                                  | +           | +            | 1714→1586        |
| (1706, 1622)                                                                                                                                  | +           | +            | 1706→1622        |
| (1706, 1614)                                                                                                                                  | +           | +            | 1706→1614        |
| (1706, 1606)                                                                                                                                  | +           | +            | 1706→1606        |
| (1706, 1586)                                                                                                                                  | +           | +            | 1706→1586        |
| (1698, 1622)                                                                                                                                  | +           | +            | 1698→1622        |
| (1698, 1614)                                                                                                                                  | +           | +            | 1698→1614        |
| (1698, 1606)                                                                                                                                  | +           | +            | 1698→1606        |
| (1698, 1586)                                                                                                                                  | +           | +            | 1698→1586        |

|                                                                                                                                                                                                                       |
|-----------------------------------------------------------------------------------------------------------------------------------------------------------------------------------------------------------------------|
| 1706 cm <sup>-1</sup> → 1698 cm <sup>-1</sup> → 1714 cm <sup>-1</sup> → 1606 cm <sup>-1</sup> → 1614 cm <sup>-1</sup> → 1586 cm <sup>-1</sup> → 1622 cm <sup>-1</sup>                                                 |
| 1706 cm <sup>-1</sup> → 1698 cm <sup>-1</sup> → 1714 cm <sup>-1</sup> → 2865 cm <sup>-1</sup> → 2945 cm <sup>-1</sup> → 1606 cm <sup>-1</sup> → 1614 cm <sup>-1</sup> → 1586 cm <sup>-1</sup> → 1622 cm <sup>-1</sup> |

**Table S3.** The sequential order of step II (32.3-46.8 °C) obtained from the synchronous and asynchronous generalized 2D correlation FTIR spectra of **Fig. S5**

| Cross peaks (cm <sup>-1</sup> , cm <sup>-1</sup> )                                                                                            | Synchronous | Asynchronous | Sequential order |
|-----------------------------------------------------------------------------------------------------------------------------------------------|-------------|--------------|------------------|
| (2945, 2865)                                                                                                                                  | +           | +            | 2945→2865        |
| 2945 cm <sup>-1</sup> → 2865 cm <sup>-1</sup>                                                                                                 |             |              |                  |
| (1714, 1706)                                                                                                                                  | +           | +            | 1714→1706        |
| (1714, 1698)                                                                                                                                  | +           | +            | 1714→1698        |
| (1706, 1698)                                                                                                                                  | +           | +            | 1706→1698        |
| 1714 cm <sup>-1</sup> → 1706 cm <sup>-1</sup> → 1698 cm <sup>-1</sup>                                                                         |             |              |                  |
| (1622, 1614)                                                                                                                                  | +           | +            | 1622→1614        |
| (1622, 1606)                                                                                                                                  | +           | +            | 1622→1606        |
| (1622, 1586)                                                                                                                                  | +           | +            | 1622→1586        |
| (1614, 1606)                                                                                                                                  | +           | -            | 1606→1614        |
| (1614, 1586)                                                                                                                                  | +           | +            | 1614→1586        |
| (1606, 1586)                                                                                                                                  | +           | +            | 1606→1586        |
| 1622 cm <sup>-1</sup> → 1606 cm <sup>-1</sup> → 1614 cm <sup>-1</sup> → 1586 cm <sup>-1</sup>                                                 |             |              |                  |
| (2945, 1714)                                                                                                                                  | +           | +            | 2945→1714        |
| (2945, 1706)                                                                                                                                  | +           | +            | 2945→1706        |
| (2945, 1698)                                                                                                                                  | +           | +            | 2945→1698        |
| (2865, 1714)                                                                                                                                  | +           | +            | 2865→1714        |
| (2865, 1706)                                                                                                                                  | +           | +            | 2865→1706        |
| (2865, 1698)                                                                                                                                  | +           | +            | 2865→1698        |
| 2945 cm <sup>-1</sup> → 2865 cm <sup>-1</sup> → 1714 cm <sup>-1</sup> → 1706 cm <sup>-1</sup> → 1698 cm <sup>-1</sup>                         |             |              |                  |
| (2945, 1622)                                                                                                                                  | +           | -            | 1622→2945        |
| (2945, 1614)                                                                                                                                  | +           | -            | 1614→2945        |
| (2945, 1606)                                                                                                                                  | +           | -            | 1606→2945        |
| (2945, 1586)                                                                                                                                  | +           | -            | 1586→2945        |
| (2865, 1622)                                                                                                                                  | +           | -            | 1622→2865        |
| (2865, 1614)                                                                                                                                  | +           | -            | 1614→2865        |
| (2865, 1606)                                                                                                                                  | +           | -            | 1606→2865        |
| (2865, 1586)                                                                                                                                  | +           | -            | 1586→2865        |
| 1622 cm <sup>-1</sup> → 1606 cm <sup>-1</sup> → 1614 cm <sup>-1</sup> → 1586 cm <sup>-1</sup> → 2945 cm <sup>-1</sup> → 2865 cm <sup>-1</sup> |             |              |                  |
| (1714, 1622)                                                                                                                                  | +           | -            | 1622→1714        |
| (1714, 1614)                                                                                                                                  | +           | -            | 1614→1714        |
| (1714, 1606)                                                                                                                                  | +           | -            | 1606→1714        |
| (1714, 1586)                                                                                                                                  | +           | -            | 1586→1714        |
| (1706, 1622)                                                                                                                                  | +           | -            | 1622→1706        |
| (1706, 1614)                                                                                                                                  | +           | -            | 1614→1706        |
| (1706, 1606)                                                                                                                                  | +           | -            | 1606→1706        |
| (1706, 1586)                                                                                                                                  | +           | -            | 1586→1706        |

|                                                                                                                                                                                                                                                                                       |   |   |           |
|---------------------------------------------------------------------------------------------------------------------------------------------------------------------------------------------------------------------------------------------------------------------------------------|---|---|-----------|
| (1698, 1622)                                                                                                                                                                                                                                                                          | + | - | 1622→1698 |
| (1698, 1614)                                                                                                                                                                                                                                                                          | + | - | 1614→1698 |
| (1698, 1606)                                                                                                                                                                                                                                                                          | + | - | 1606→1698 |
| (1698, 1586)                                                                                                                                                                                                                                                                          | + | - | 1586→1698 |
| $1622\text{ cm}^{-1} \rightarrow 1606\text{ cm}^{-1} \rightarrow 1614\text{ cm}^{-1} \rightarrow 1586\text{ cm}^{-1} \rightarrow 1714\text{ cm}^{-1} \rightarrow 1706\text{ cm}^{-1} \rightarrow 1698\text{ cm}^{-1}$                                                                 |   |   |           |
| $1622\text{ cm}^{-1} \rightarrow 1606\text{ cm}^{-1} \rightarrow 1614\text{ cm}^{-1} \rightarrow 1586\text{ cm}^{-1} \rightarrow 2945\text{ cm}^{-1} \rightarrow 2865\text{ cm}^{-1} \rightarrow 1714\text{ cm}^{-1} \rightarrow 1706\text{ cm}^{-1} \rightarrow 1698\text{ cm}^{-1}$ |   |   |           |

## References

1. J. V. M. Weaver, I. Bannister, K. L. Robinson, X. Bories-Azeau, S. P. Armes, M. Smallridge and P. McKenna, *Macromolecules*, 2004, **37**, 2395-2403.
2. K. Mizuno, Y. Miyashita, Y. Shindo and H. Ogawa, *J. Phys. Chem.*, 1995, **99**, 3225-3228.
3. B. Monakhova Yulia, H. Schäfer, E. Humpfer, M. Spraul, T. Kuballa and W. Lachenmeier Dirk, *Magn. Reson. Chem.*, 2011, **49**, 734-739.
4. A. Balaceanu, D. E. Demco, M. Möller and A. Pich, *Macromolecules*, 2011, **44**, 2161-2169.
5. S. Kozanoğlu, T. Özdemir and A. Usanmaz, *J. Macromol. Sci., Part A: Pure Appl. Chem.*, 2011, **48**, 467-477.
6. S. Zhang and L. Echegoyen, *J. Am. Chem. Soc.*, 2005, **127**, 2006-2011.
7. N. Wang, G. Ru, L. Wang and J. Feng, *Langmuir*, 2009, **25**, 5898-5902.
